# Supplementary material for: A selenophene substituted double-cable conjugated polymer enables efficient single-component organic solar cells
Source: Royal Society of Chemistry journal article supplement (doi:10.1039/c9tc06667e), 2020-01-01
Supplement: c9tc06667e1.pdf [file c9tc06667e1.pdf]

## Supporting Information

### A Selenophene Substituted Double-cable Conjugated Polymer Enables Efficient Single-Component Organic Solar Cells

Peiting Yu,<sup>a,c</sup> Guitao Feng,<sup>c,d</sup> Junyu Li,<sup>c</sup> Cheng Li,<sup>c</sup> Yunhua Xu,<sup>\*,a</sup> Chengyi Xiao,<sup>\*,b</sup>  
and Weiwei Li<sup>\*,b,c,e</sup>

<sup>a</sup> Department of Chemistry, School of Science, Beijing Jiaotong University, Beijing 100044, P. R. China. E-mail: yhxu@bjtu.edu.cn

<sup>b</sup> State Key Laboratory of Organic-Inorganic Composites, Beijing University of Chemical Technology, Beijing 100029, P. R. China. E-mail: [liweiwei@iccas.ac.cn](mailto:liweiwei@iccas.ac.cn) or [xiaocy@mail.buct.edu.cn](mailto:xiaocy@mail.buct.edu.cn)

<sup>c</sup> Beijing National Laboratory for Molecular Sciences, Key Laboratory of Organic Solids, Institute of Chemistry, Chinese Academy of Sciences, Beijing 100190, P. R. China.

<sup>d</sup> University of Chinese Academy of Sciences, Beijing 100049, P. R. China.

<sup>e</sup> Institute of Applied Chemistry, Jiangxi Academy of Sciences, Nanchang 330096, P. R. China.

### Contents

1. Materials and measurements
2. Synthesis of the monomer and polymer
3. OFETs
4. Single-component organic solar cells
5. NMR of the compounds and polymer
6. References

## 1. Materials and measurements

The synthetic procedures were performed under argon atmosphere. Commercial chemicals (from Energy Chemical, sigma-Aldrich, TCI, Innochem and JK Chemical) were used as received. The polymer PBDBPBI-Se was synthesized by the route as Scheme 1 shows, compound M1 and M3 were prepared according to literature procedures<sup>1, 2</sup>. The double-cable polymer PBDBPBI-S and donor polymer PBDB-S and PBDB-Se were prepared by the literature.<sup>3</sup>

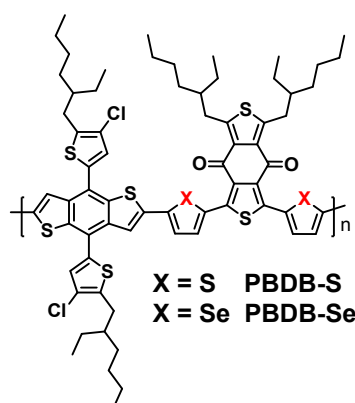

**Figure S1.** Chemical structures of the donor polymer PBDB-S and PBDB-Se.

$^1\text{H}$ -NMR and  $^{13}\text{C}$ -NMR spectra were recorded at 400 MHz and 100 MHz on a Bruker AVANCE spectrometer with tetramethylsilane (TMS) as the internal standard. The Molecular weight was determined with GPC at 140 °C on a PL-GPC 220 system using a PL-GEL 13  $\mu\text{m}$  Olexis column and *o*-DCB as the eluent against polystyrene standards. The two-dimensional (2D) GIWAXS/MAXS experiments were carried out on a GANESHA 300XL+ system from JJ X-ray in the X-ray lab at DSM Materials Sciences Center (DMSC). The instrument is equipped with a Pilatus 300K detector, with pixel size of 172  $\mu\text{m} \times 172 \mu\text{m}$ . The X-ray source is a Genix 3D Microfocus Sealed Tube X-Ray Cu-source with integrated Monochromator (multilayer optic “3D version” optimized for SAXS) (30 W). The wavelength used is  $\lambda = 1.5418 \text{ \AA}$ . The detector moves in a vacuum chamber with sample-to-detector distance varied between 0.115 m and 1.47 m depending on the configuration used, as calibrated by using silver behenate ( $d_{001} = 58.380 \text{ \AA}$ ). The minimized background scattering plus high-performance detector allows for a detectable  $q$ -range varying from  $3 \times 10^{-3}$  to  $3 \text{ \AA}^{-1}$  (0.2 to 210 nm). The sample was placed vertically on the goniometer and tilted to a

glancing angle of  $0.2^\circ$  with respect to the incoming beam. A small beam was used to get a better resolution. The primary slits have a size of  $0.3$  (horizontal)  $\times$   $0.5$  mm (vertical), and the guard slits have a size of  $0.1$  (horizontal)  $\times$   $0.3$  (horizontal) mm. The accumulation time was 6 h for each measurement. GIMAXS scattering curves (at Yoneda maximum) were obtained by using SAXSGUI program.

## 2. Synthesis of the monomer and polymer

**((5-(5,7-bis(2-ethylhexyl)-4,8-dioxo-3-(5-(trimethylstannyl)selenophen-2-yl)-4H,8H-benzo[1,2-c:4,5-c']dithiophen-1-yl)selenophen-2-yl)dimethylstannyl)methylum (M2)**

1,3-bis(2-ethylhexyl)-5,7-di(selenophen-2-yl)-4H,8H-benzo[1,2-c:4,5-c']dithiophene-4,8-dione (**M1**) (272 mg, 0.387 mmol) was dissolved in dry tetrahydrofuran under an inert atmosphere. The solution was cooled down to  $-78^\circ\text{C}$  by using a liquid ethyl alcohol and then freshly made LDA (0.97 mmol in THF) was added drop-wise. The reaction was stirred at  $-78^\circ\text{C}$  for 1h and trimethyltinchloride  $[(\text{CH}_3)_3\text{SnCl}$ , 1.16 mmol, 1 M in THF] was subsequently added. The mixture was stirred at room temperature overnight. The reactant was quenched by water, then extracted by diethyl ether (200 mL) and dried over anhydrous  $\text{Na}_2\text{SO}_4$ . After removing solvent, the crude product was purified by recrystallization using ethyl alcohol to obtain **M2** (210 mg, yield 52.7%) as orange solid.  $^1\text{H}$  NMR ( $\text{CDCl}_3$ , 400 MHz):  $\delta$  (ppm) 8.03 (d, 2H), 7.54 (d, 2H), 3.32 (t, 4H), 1.78 (s, 2H), 1.36 (m, 16H), 0.97-0.90 (m, 12H), 0.51-0.33 (t, 18H).  $^{13}\text{C}$  NMR ( $\text{CDCl}_3$ , 100 MHz):  $\delta$  (ppm) 178.0, 153.0, 142.5, 137.5, 133.6, 133.1, 41.2, 33.7, 32.9, 28.9, 26.1, 23.0, 14.2, 10.9, 1.0, 0, -7.9. HRMS (MALDI-TOF)  $m/z$ :  $[\text{M}]^+$ , Calcd for  $\text{C}_{40}\text{H}_{56}\text{O}_2\text{S}_2\text{Se}_2\text{Sn}_2$ : 1033.019135, found: 1033.016784.

### PBDBPBI-Se

To a degassed solution of monomer **M2** (15.71 mg, 15.27  $\mu\text{mol}$ ), **M3** (35.74 mg, 15.27  $\mu\text{mol}$ ) in toluene (4 mL) and DMF (0.4 mL),  $\text{Pd}_2(\text{dba})_3$  (0.42 mg, 0.46  $\mu\text{mol}$ ) and  $\text{PPh}_3$  (0.48 mg, 1.83  $\mu\text{mol}$ ) were added. The mixture was stirred at  $115^\circ\text{C}$  for 24

h, after which it was precipitated in methanol and filtered through a Soxhlet thimble. The polymer was extracted with acetone, hexane, dichloromethane and 1,1,2,2-tetrachloroethane. The solvent was evaporated and the polymer was precipitated in acetone. The polymer was collected by filtering over a 0.45  $\mu\text{m}$  PTFE membrane filter and dried in a vacuum oven to yield PBDBPBI-Se (40.2 mg, 91.36%) as a dark solid. GPC (*o*-DCB, 140  $^{\circ}\text{C}$ ):  $M_n = 47.1 \text{ kg mol}^{-1}$ ,  $M_w = 82.4 \text{ kg mol}^{-1}$  and PDI = 1.75.

### 3. OFETs

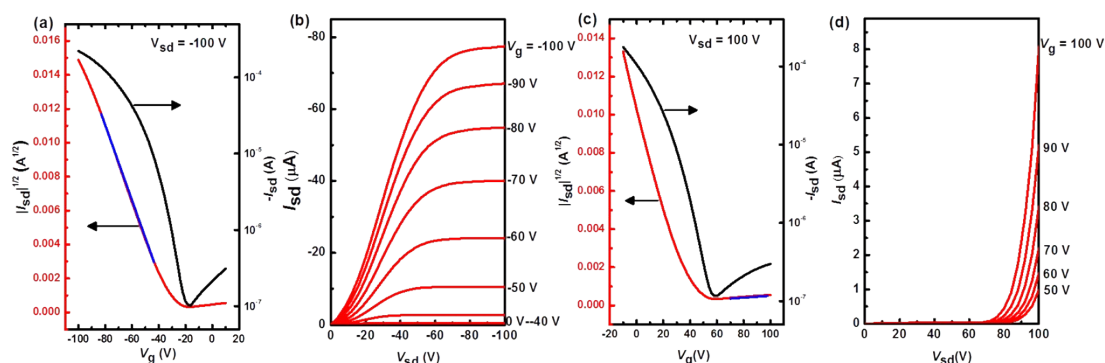

**Figure S2.** (a, c) Transfer and (b, d) output curves obtained from BGBC FET devices based on PBDBPBI-Se thin films fabricated from *o*-DCB after thermal annealed at 280  $^{\circ}\text{C}$ . The blue lines in the figures were used to calculate (a) hole and (c) electron mobilities.

### 4. Single-component organic solar cells

**Table S1.** Characteristics of PBDBPBI-Se based solar cells spin coated from different solution, thickness and different thermal annealing temperature (10 min).

| Solvent                  | TA<br>[ $^{\circ}\text{C}$ ] | Thickness<br>[nm] | $J_{\text{sc}}$<br>[ $\text{mA cm}^{-2}$ ] | $V_{\text{oc}}$<br>[V] | FF   | PCE<br>[%] |
|--------------------------|------------------------------|-------------------|--------------------------------------------|------------------------|------|------------|
| <i>o</i> -DCB            | r. t.                        | 65                | 5.08                                       | 0.90                   | 0.31 | 1.44       |
| <i>o</i> -DCB/DIO (0.5%) | r. t.                        | 65                | 5.27                                       | 0.92                   | 0.32 | 1.56       |
| <i>o</i> -DCB/DIO (1%)   | r. t.                        | 65                | 4.39                                       | 0.93                   | 0.30 | 1.23       |
| <i>o</i> -DCB/DIO (0.5%) | r. t.                        | 65                | 5.27                                       | 0.92                   | 0.32 | 1.56       |
| <i>o</i> -DCB/DIO (0.5%) | 150                          | 70                | 5.67                                       | 0.90                   | 0.32 | 1.64       |
| <i>o</i> -DCB/DIO (0.5%) | 230                          | 70                | 12.68                                      | 0.84                   | 0.58 | 6.25       |
| <i>o</i> -CB/DIO (0.5%)  | 280                          | 70                | 12.34                                      | 0.80                   | 0.56 | 5.51       |

|                         |     |    |       |      |      |      |
|-------------------------|-----|----|-------|------|------|------|
| <i>o</i> -CB/DIO (0.5%) | 230 | 80 | 12.82 | 0.84 | 0.55 | 5.99 |
| <i>o</i> -CB/DIO (0.5%) | 230 | 70 | 12.68 | 0.84 | 0.58 | 6.25 |
| <i>o</i> -CB/DIO (0.5%) | 230 | 60 | 11.58 | 0.84 | 0.61 | 5.92 |
| <i>o</i> -CB/DIO (0.5%) | 230 | 50 | 11.08 | 0.84 | 0.63 | 5.82 |

**Table S2.** Photovoltaic performances of 8 devices based on PBDBPBI-Se fabricated from *o*-DCB/DIO (0.5%) without thermal annealing.

| No.     | $J_{sc}$<br>[mA/cm <sup>2</sup> ] | $V_{oc}$<br>[V] | FF         | PCE<br>[%] |
|---------|-----------------------------------|-----------------|------------|------------|
| 1       | 5.39                              | 0.91            | 0.34       | 1.65       |
| 2       | 5.27                              | 0.92            | 0.32       | 1.56       |
| 3       | 5.30                              | 0.92            | 0.32       | 1.54       |
| 4       | 5.26                              | 0.92            | 0.32       | 1.55       |
| 5       | 5.28                              | 0.92            | 0.32       | 1.55       |
| 6       | 5.43                              | 0.92            | 0.33       | 1.62       |
| 7       | 5.41                              | 0.92            | 0.33       | 1.62       |
| 8       | 5.05                              | 0.91            | 0.33       | 1.51       |
| average | 5.30±0.11                         | 0.92±0.004      | 0.33±0.007 | 1.58±0.05  |

**Table S3.** Photovoltaic performances of 8 devices based on PBDBPBI-Se fabricated from *o*-DCB/DIO (0.5%) and thermal annealed at 230 °C for 10 min.

| No.     | $J_{sc}$<br>[mA/cm <sup>2</sup> ] | $V_{oc}$<br>[V] | FF        | PCE<br>[%] |
|---------|-----------------------------------|-----------------|-----------|------------|
| 1       | 11.75                             | 0.85            | 0.61      | 6.05       |
| 2       | 12.83                             | 0.84            | 0.56      | 6.07       |
| 3       | 12.79                             | 0.83            | 0.57      | 6.01       |
| 4       | 12.93                             | 0.83            | 0.57      | 6.12       |
| 5       | 12.68                             | 0.84            | 0.58      | 6.25       |
| 6       | 12.69                             | 0.84            | 0.58      | 6.22       |
| 7       | 12.58                             | 0.84            | 0.58      | 6.12       |
| 8       | 12.61                             | 0.84            | 0.58      | 6.15       |
| average | 12.61±0.34                        | 0.84±0.01       | 0.58±0.01 | 6.12±0.08  |

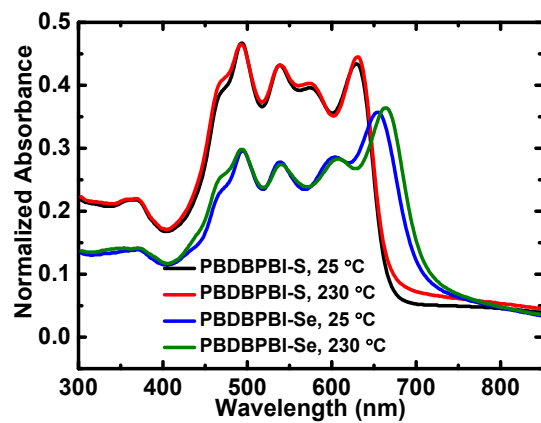

**Figure S3.** Absorption spectra of the polymer thin films annealed at different temperature.

## 5. NMR of the compounds and the polymer

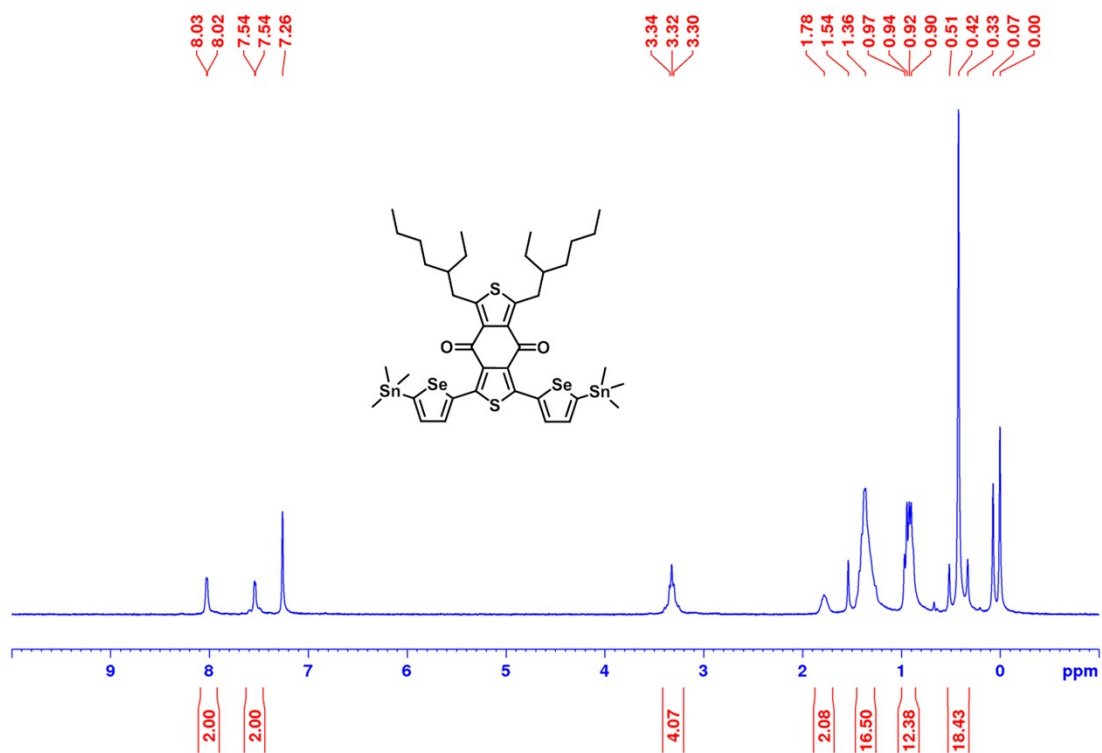

**Figure S4.**  $^1\text{H}$ -NMR of the compound M2 recorded in  $\text{CDCl}_3$ .



## 6. References

1. H. Zhang, S. Zhang, K. Gao, F. Liu, H. Yao, B. Yang, C. He, T. P. Russell and J. Hou, *J. Mater. Chem. A*, 2017, **5**, 10416-10423.
2. G. Feng, J. Li, F. J. M. Colberts, M. Li, J. Zhang, F. Yang, Y. Jin, F. Zhang, R. A. J. Janssen, C. Li and W. Li, *J. Am. Chem. Soc.*, 2017, **139**, 18647-18656.
3. S. Zhang, Y. Qin, J. Zhu and J. Hou, *Advanced Materials*, 2018, **30**, 1800868.
